# Supplementary material
Source: PubMed Central journal article supplement (PMC4335901)
Supplement: AAC.03588-14_zac001153638so1.pdf [file AAC.03588-14_zac001153638so1.pdf]

## Supplementary information

**Supplementary Table 1. Minimum inhibitory concentration of compounds**

| <b>Compound</b> | <b>MIC <i>M.tuberculosis</i> (<math>\mu\text{M}</math>)</b> | <b>MIC <i>M.marinum</i> (<math>\mu\text{M}</math>)</b> |
|-----------------|-------------------------------------------------------------|--------------------------------------------------------|
| GSK6            | 0,08                                                        | 1,56                                                   |
| GSK10           | 0,06                                                        | 0,39                                                   |
| GSK11           | 1,11                                                        | 6,25                                                   |
| GSK12           | 1,59                                                        | 6,25                                                   |
| GSK13           | 0,9                                                         | 6,25                                                   |
| GSK14           | 0,47                                                        | 0,39                                                   |
| GSK17           | 0,03                                                        | 0,78                                                   |
| GSK19           | 0,12                                                        | 0,78                                                   |
| GSK20           | 0,04                                                        | 0,39                                                   |
| GSK30           | 0,06                                                        | 0,78                                                   |
| GSK32           | 0,04                                                        | 0,39                                                   |
| GSK34           | 0,08                                                        | 0,78                                                   |
| GSK37           | 0,22                                                        | 12,5                                                   |
| GSK38           | 0,04                                                        | 0,78                                                   |
| GSK43           | 1,28                                                        | 6,25                                                   |

**Supplementary Table 2. Amount of GSK compounds in the whole larval lysates**

| <b>Compound</b> | <b>0 hpe (pmol/larva)</b> | <b>17 hpe (pmol/larva)</b> | <b>40 hpe (pmol/larva)</b> |
|-----------------|---------------------------|----------------------------|----------------------------|
| GSK6            | 0,10                      | 35,88                      | 103,36                     |
| GSK10           | 12,75                     | 1896,36                    | 1100,54                    |
| GSK11           | 2,55                      | 2,53                       | 4,17                       |
| GSK12           | 0,46                      | 0,60                       | 3,22                       |
| GSK13           | 0,18                      | 2,15                       | 27,62                      |
| GSK14           | 0,04                      | 60,53                      | 119,18                     |
| GSK17           | 0,62                      | 9,88                       | 94,52                      |
| GSK19           | 0,00                      | 0,29                       | 0,60                       |
| GSK20           | 0,17                      | 0,59                       | 9,69                       |
| GSK30           | 0,00                      | 0,36                       | 1,58                       |
| GSK32           | 0,07                      | 0,54                       | 3,15                       |
| GSK34           | 0,01                      | 0,00                       | 0,04                       |
| GSK37           | 0,15                      | 3,36                       | 13,84                      |
| GSK38           | 0,00                      | 2,11                       | 6,89                       |
| GSK43           | 0,37                      | 35,29                      | 10,38                      |

**Supplementary Table 3. Log reduction in CFU count in the acute mouse model**

| <b>Compound</b> | <b>CFU reduction</b> |
|-----------------|----------------------|
| GSK6            | 1,65                 |
| GSK10           | 0,1                  |
| GSK11           | 2,85                 |
| GSK12           | 1,76                 |
| GSK13           | 0,03                 |
| GSK14           | 2,92                 |
| GSK17           | 2,98                 |
| GSK19           | 2,52                 |
| GSK20           | 4,65                 |
| GSK30           | 1,95                 |
| GSK32           | 3,7                  |
| GSK34           | 0,99                 |
| GSK37           | 2,3                  |
| GSK38           | 1,14                 |
| GSK43           | 1,06                 |

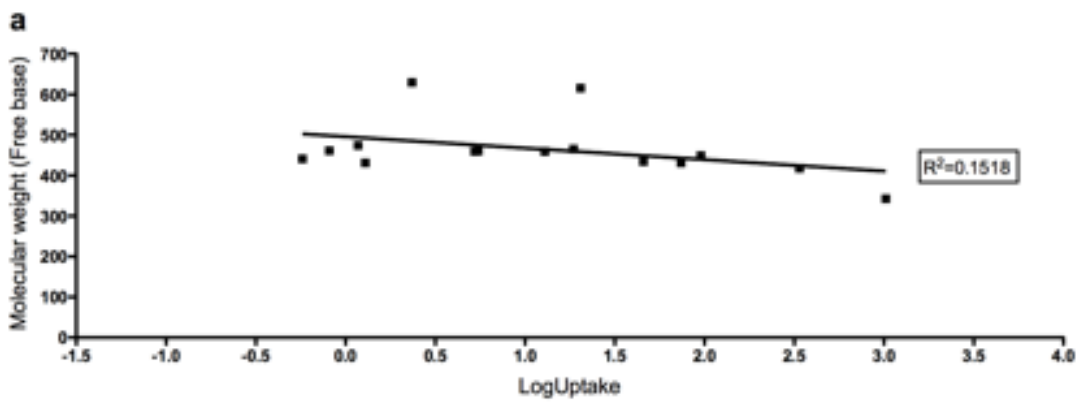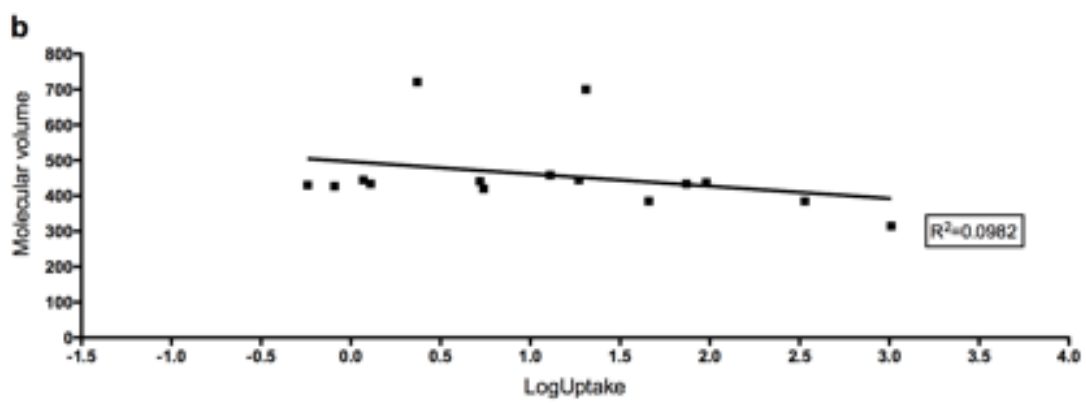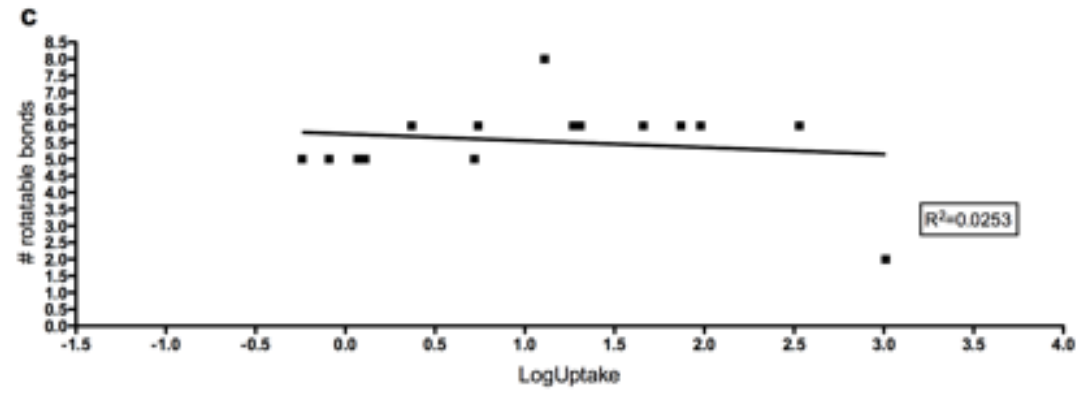

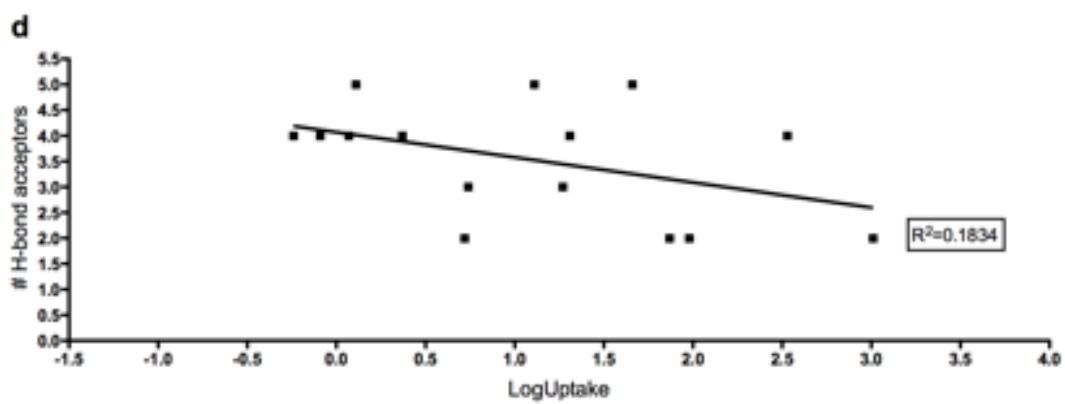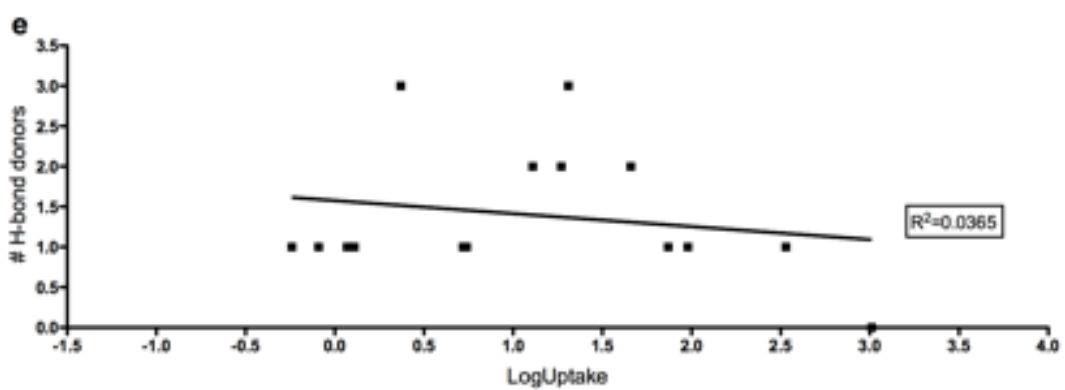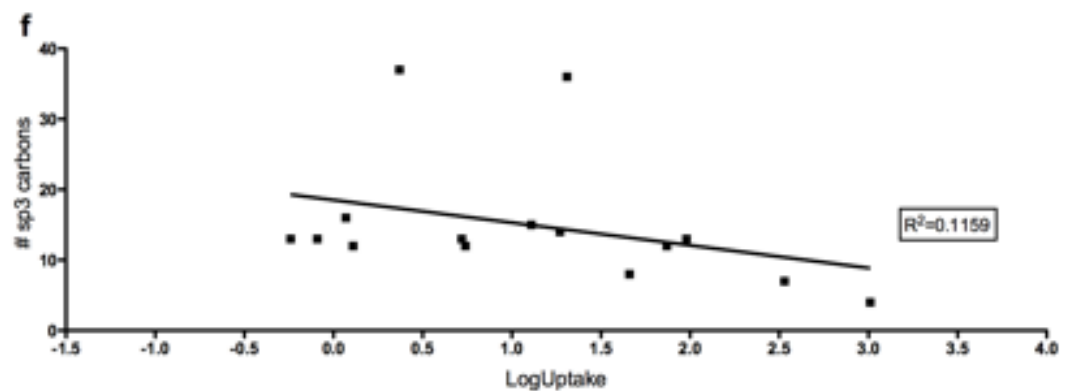

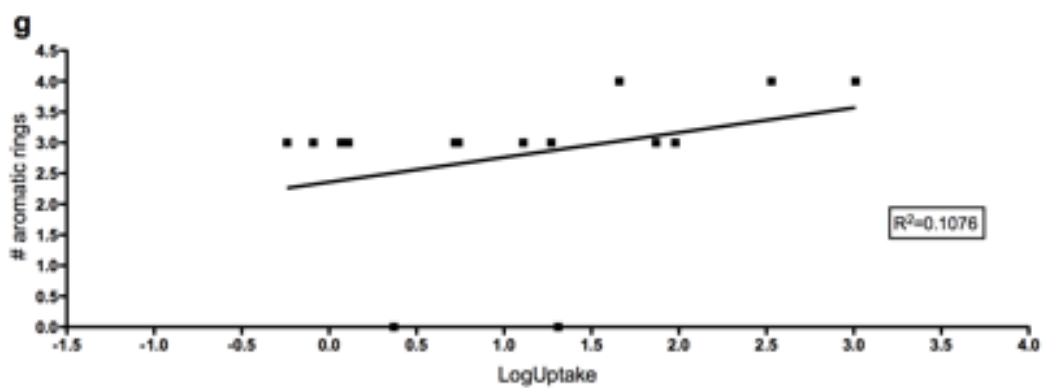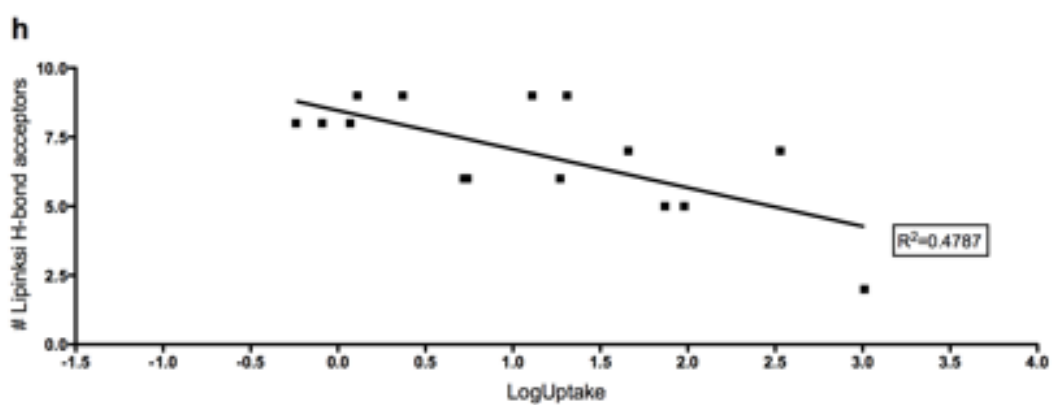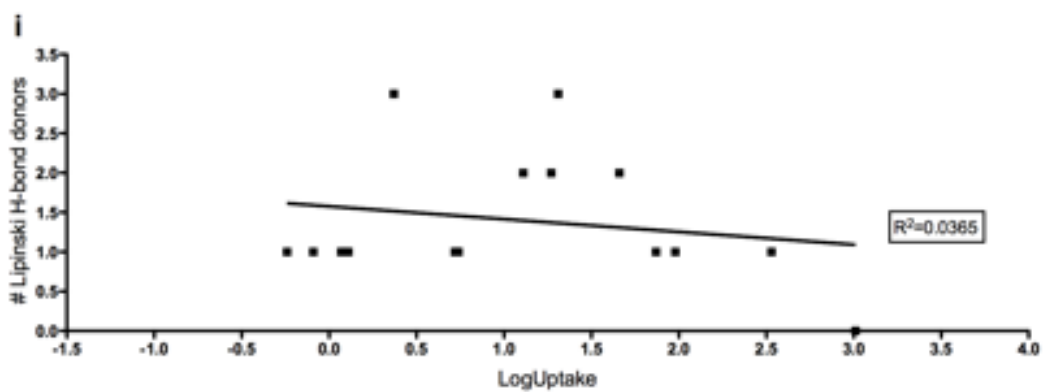

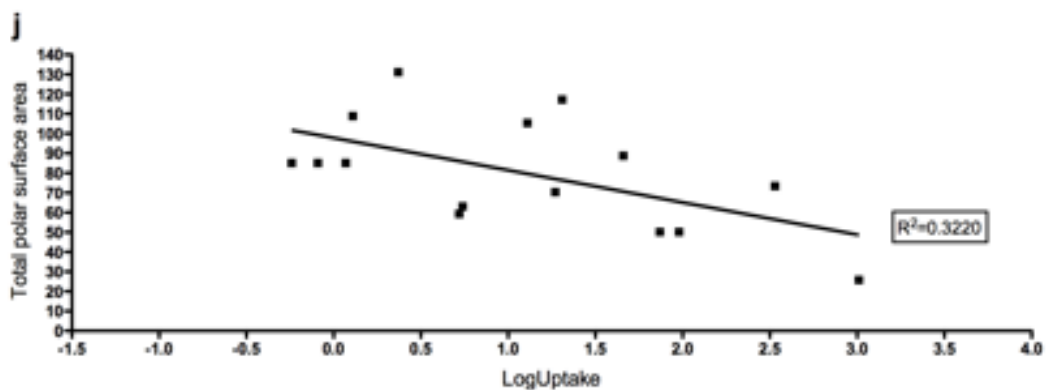

**Supplementary Figure 1: Uptake versus physico-chemical properties.** Common metrics used in predictive strategies was compared to the uptake levels of the 15 compounds used in our assays. In the examination uptake level was compared to (a) molecular weight, (b) molecular volume, (c) number of rotatable bonds, (d) hydrogen bond acceptors and (e) donors, (f) number of sp<sup>3</sup> carbons, (g) number of aromatic rings, (h) number of Lipinski H-bond acceptors and (i) donors, and (j) polar surface area.

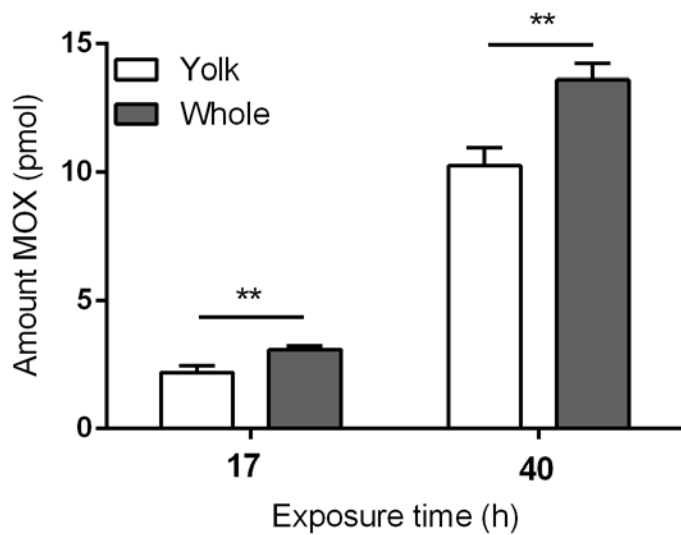

**Supplementary Figure 2. Comparison of the amount of moxifloxacin measured in the samples from the yolk and lysates of whole zebrafish larvae.** Level of moxifloxacin was measured after 17 (4 day old larvae) and 40 hours (5 day old larvae) of drug exposure using samples from the yolk (white bars) and from the lysates of whole larvae (grey bars) (n=10). Data are expressed as the mean  $\pm$  S.E.M. Significance is indicated with asterisks (\*\*P<0.01)



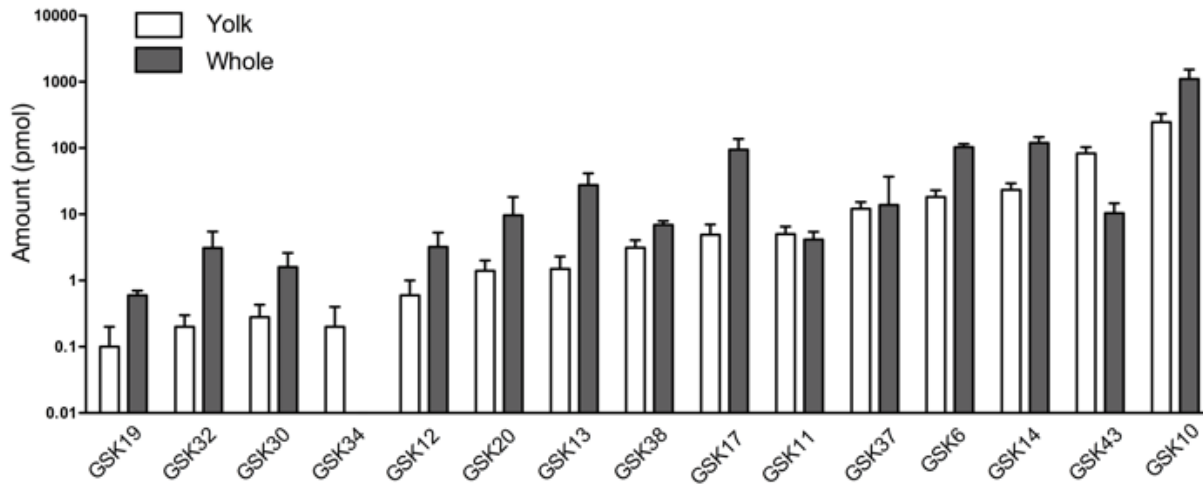

**Supplementary Figure 3. Comparison of the amount of GSK compounds measured in the samples from the yolk and lysates of whole zebrafish larvae.** Level of 15 GSK compounds was measured after 40 hours (5 day old larvae) of drug exposure using samples from the yolk (white bars) and from the lysates of whole larvae (grey bars) (n=5). Data are expressed as the mean  $\pm$  S.E.M.
